# Supplementary material for: Progenitor/Stem Cell Delivery by Suprarenal Aorta Route in Acute Kidney Injury
Source: PubMed Central journal article supplement — Cell Transplant. 2019 Aug 13;28(11):1390–403. doi: 10.1177/0963689719860826 (PMC6802150; doi:10.1177/0963689719860826), 2019-08-13

## MATERIALS

### REAGENTS

- Female 2 months-old Sprague-Dawley (SD) rats (Charles River Wilmington, MA), weighing 200-250 g. **! CAUTION** All animal studies must be reviewed and approved by the Institutional Animal Care and Use Committees (IACUC) to ensure that they conform to relevant ethics regulations.
- Buprenorphine hydrochloride, 0.3 mg/vial (Webster Veterinary, cat. no. 07-001-9413, <http://webstervet.com>). **! CAUTION** Buprenorphine hydrochloride may cause prolonged respiratory depression. Wear protective clothing to avoid contact or inhalation. Buprenorphine is a controlled substance and should be handled according to relevant institutional rules.
- Euthasol (pentobarbital sodium and phenytoin sodium) solution 100 mL (Virbac, cat. no. 710101, <http://www.virbacvet.com>). **! CAUTION** Pentobarbital sodium produces rapid anesthetic action and unconsciousness. Phenytoin sodium produces cardiovascular collapse and central nervous system depression. Wear protective clothing to avoid contact or inhalation. Euthasol is a controlled substance and should be handled according to relevant institutional rules.
- Isoflurane, USP 100 mL (Piramal Healthcare, NDC: 66794-013-10, <http://www.piramalcriticalcare.com>). **! CAUTION** Isoflurane may cause prolonged respiratory depression and unconsciousness. Wear protective clothing to avoid contact or inhalation. Isoflurane is a controlled substance and should be handled according to relevant institutional rules. Use a vaporizer to minimize isoflurane exposition.

- Sodium chloride (0.9% (wt/vol)), 1 liter (Abbot Labs, cat. no. 04925-10, <http://www.abbotanimalhealth.com>).
- Compressed oxygen cylinder, USP grade (Airgas, cat. no. OX USP200, <http://www.airgas.com>).
- Ophthalmic ointment
- Heparin sodium injection, USP, 1000 U/mL (APP Pharmaceuticals, LLC, cat. no. 540-31 <http://www.apppharma.com>).
- Dextrose 50% solution (Vedco, cat. no. 18-801-50, <http://www.vedco.com>).
- Dulbecco's Phosphate Buffered Saline (DPBS) without calcium and magnesium (GIBCO, cat. no. 14190-144).
- 70% ethanol.
- Iodo-alcohol.

## **EQUIPMENT**

- Biosafety cabinet with vertical laminar flow and equipped with UV light for decontamination.
- Water bath with temperature control.
- Centrifuge with temperature control.
- Hemocytometer.
- 15 ml polypropylene tube.
- Pipette and pipette sterile tips.
- 5 ml round-bottom tube with cell strainer cap 35 $\mu$ m (BD Falcon <sup>TM</sup>, cat. 352235, <http://www.bdbiosciences.com>).

- 5 ml round-bottom tube with a snap cap (BD Falcon <sup>TM</sup>, cat. 352063, <http://www.bdbiosciences.com>).
- DMSO (Dimethyl Sulfoxide) (Sigma-Aldrich, cat. no. D2650, <http://www.sigmaaldrich.com>).
- BD angiocath <sup>TM</sup> brand BD autoguard <sup>TM</sup> shielded IV catheters 14-gauge x 1.75 "" (2.1 c 45 mm), orange (BD Becton, Dickinson and Company, cat no. 381709, <http://www.bd.com>).
- Needles: 25-gauge x 5/8 in. BD<sup>TM</sup> (BD Becton, Dickinson and Company, cat. no. 305122, <http://www.bd.com>) and 18-gauge x 1 1/2 in. BD<sup>TM</sup> (BD Becton, Dickinson and Company, cat. no. 305196, <http://www.bd.com>).
- Model 683 small animal ventilator (Harvard apparatus, cat no. PY2 55-0000, <http://www.harvardapparatus.com>).
- T3 isoflurane funnel-fill vaporizer (Harvard apparatus, cat no. PY2 72-8132, <http://www.harvardapparatus.com>).
- 4 Port Anesthetic Manifold –connect to 2 anesthetic devices (Harvard apparatus, cat no. PY2 60-5242, <http://www.harvardapparatus.com>).
- Oxygen regulator
- Germinator<sup>TM</sup> 500 Dry Sterilizer (Roboz, cat. no. DS-401, <http://www.roboz.com>).
- Vannas Micro-dissecting (eye) Scissors 8.5 cm straight, spring action (Harvard apparatus, cat. no. PY2 72-8503, <http://www.harvardapparatus.com>).
- Micro Dissecting Scissors, sure cut blades, straight, sharp points, 24 mm blade length, 4 1/2" overall length (Roboz, cat. no. RS-5912SC, <http://www.roboz.com>).
- Metzenbaum Scissors 5.75" overall length, curved extra delicate, 32 mm blades (Roboz, cat. no. RS-6959, <http://www.roboz.com>).

- Mayo Scissors, straight, 43mm blade length, 4.5" overall length (Roboz, cat. no. RS-6870, <http://www.roboz.com>).
- Halsted–mosquito, hemostatic forceps 12.5 cm, straight (Harvard apparatus, cat. no. PY2 72-8973, <http://www.harvardapparatus.com>).
- Graefe Tissue Forceps 4" (10 cm) long full curve 1x2 teeth 0.8 mm tip (Roboz, cat. no. RS-5157, <http://www.roboz.com>).
- Graefe Tissue Forceps 4" (10 cm) long, serrated slight curve extra delicate 0.5 mm tip (Roboz, cat. no. RS-5136, <http://www.roboz.com>).
- Semken Forceps, 2x3 teeth, 1.4 mm tip width, 5" length (Roboz, cat. no. RS-5244, <http://www.roboz.com>).
- Alm Retractor, blunt 4x4 prongs, 5mm depth, 3" spread, 4" length (Roboz, cat. no. RS-6514, <http://www.roboz.com>).
- Vessel clips, jaw length 4 mm, width of jaw 0.75 mm, locking pressure 125 g (Harvard apparatus, cat. no. PY2 72-8816, <http://www.harvardapparatus.com>).
- Schwartz temporary clip, straight, smooth; 795 grams pressure, 1.7 mm jaw width, 8 mm jaw length, 1" clip length (Roboz, cat. no. RS-5452, <http://www.roboz.com>).
- Polypropylene suture (Prolene), 18" (45 cm) 4.0 (1.5 metric) (FS-1, 24 mm, 3/8 c reverse cutting) (Ethicon, cat. no. 8629H, <http://www.ethicon.com>).
- Silk suture (Ligapak dispensing reel, black braided) 144" (365 cm) 3.0 (2.0 metric) (Ethicon, cat. no. LA54G, <http://www.ethicon.com>).
- Cotton tipped cleaning sticks 6-inches (15 cm) (Puritan Medical Products, cat. no. 861-WC DBL, <http://www.puritanmedproducts.com>).

- Stainless steel disposable scalpels number 11 (Miltex, cat. no. 4-411, <http://www.miltex.com>).
- Insulin syringes with the BD ultra-fine needle, capacity ½ mL cc, length 8 mm (5/16”), 31-gauge (BD, cat. no. 328468, <http://www.bd.com>).
- Tygon flexible plastic tubing S-54-HL (Harvard apparatus, cat no. PY2 72-0993, <http://www.harvardapparatus.com>).
- Surgicel Nu-Knit absorbable hemostat (oxidized regenerated cellulose) 6in x 9in (15.2 cm x 22.9 cm) (Ethicon, cat no. JJ1946, <http://www.ethicon.com>).
- Intravenous set
- *Surgical instruments*: We have listed the instruments that we currently use, but one should feel free to substitute alternative and comparable instruments at one’s discretion.

**Figure 1S.** Transmission electron microscopy (TEM) analyses of saline-treated group (A), MSC-treated group (B), and c-Kit treated group (C).

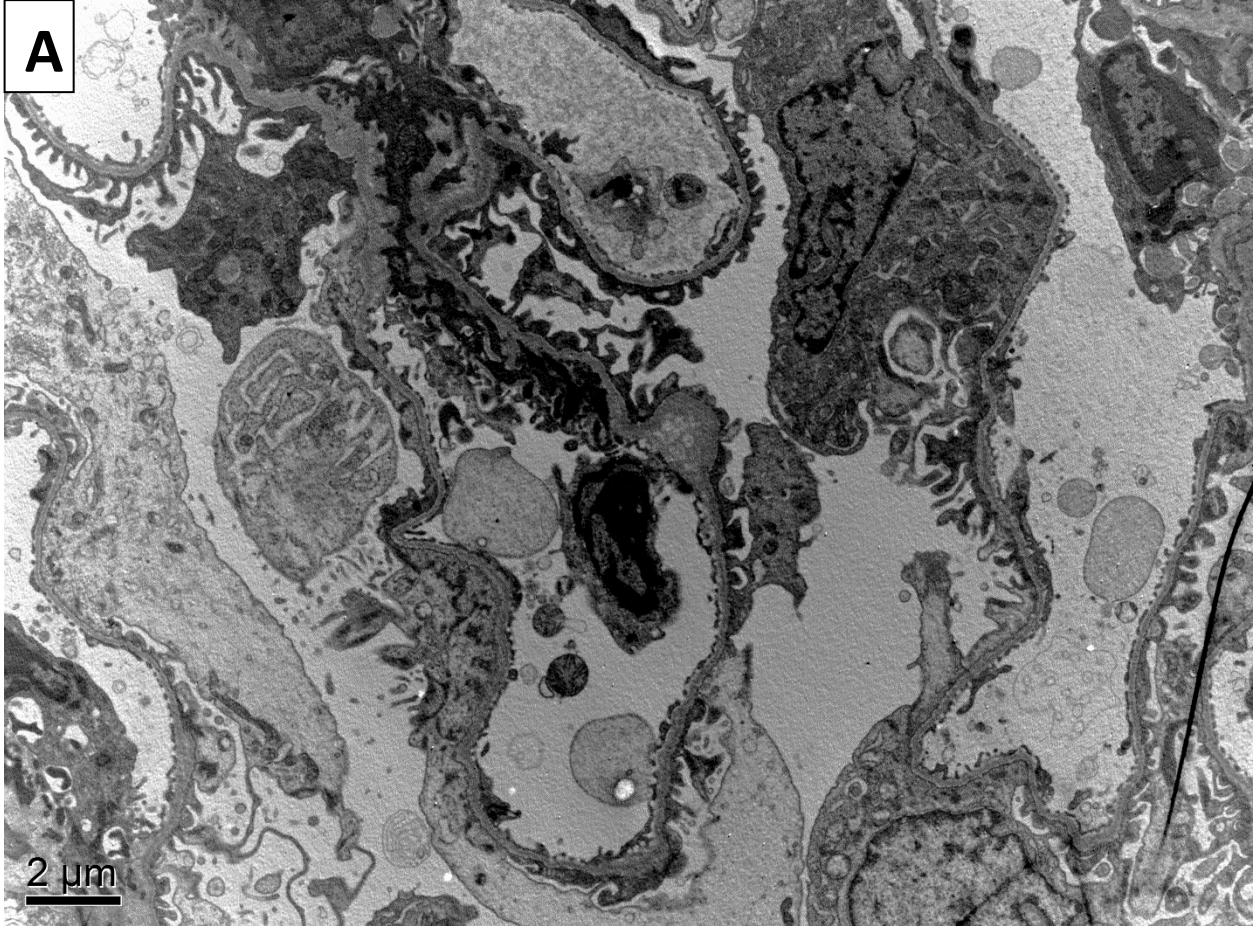

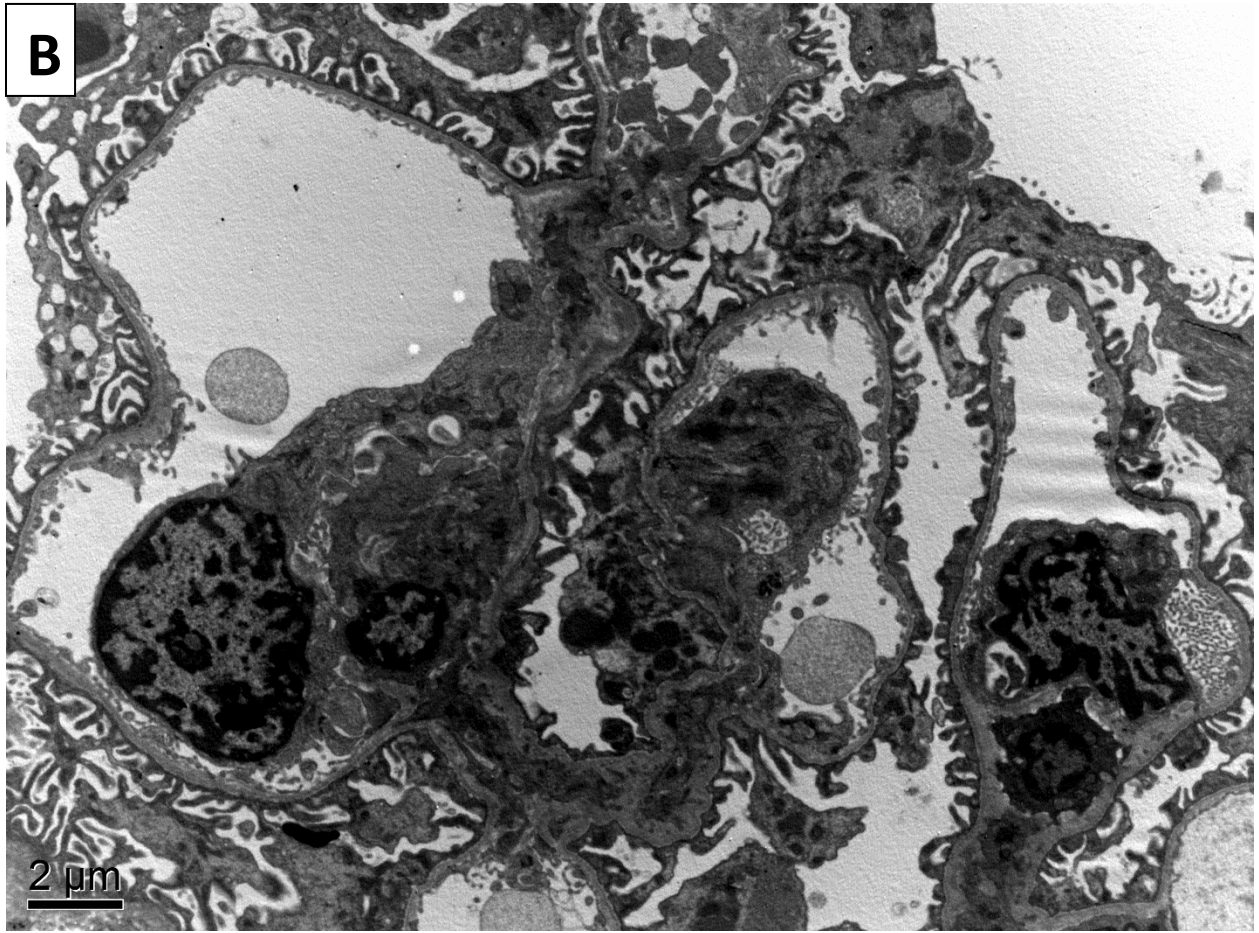

C

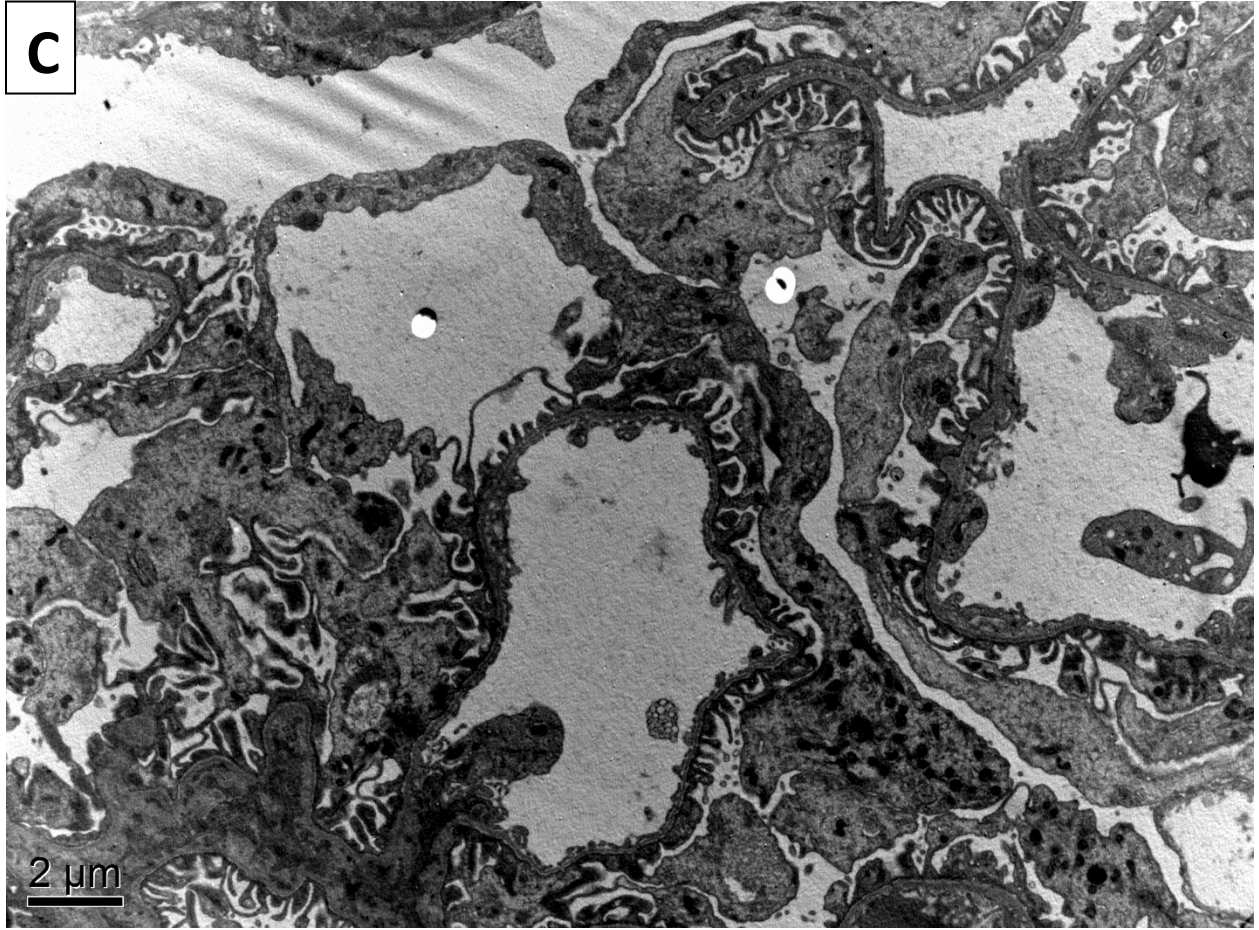

Supplement: Cell_Transplantation_Supplemental_File.pdf [file Cell_Transplantation_Supplemental_File.pdf]
